# Supplementary material
Source: Research Square preprint supplement (doi:10.21203/rs.3.rs-10155429/v1)
Supplement: Supplementary file 1 [file ed3124d8a92adbc710595811.pdf]

# Supporting Information For

## Ultrafast Electrical Charge Injection in Operating Perovskite Light-Emitting Diodes by Infrared Optical Control

Ruoyu Gao<sup>1</sup>, Zhongcheng Yuan<sup>2,3</sup>, Bin Yang<sup>1</sup>, Longren Li<sup>1</sup>, Marie Houot<sup>1</sup>,  
Mengyuan Huang<sup>1</sup>, Ben Spencer<sup>4</sup>, Seonghyeok Park<sup>5</sup>, Nicola Gasparini<sup>1</sup>,  
Henry J. Snaith<sup>2,\*</sup>, Ziming Chen<sup>1,6,\*</sup>, and Artem A. Bakulin<sup>1,\*</sup>

<sup>1</sup> Department of Chemistry and Centre for processable Electronics, Molecular Sciences Research Hub, Imperial College London, London W12 0BZ, United Kingdom.

<sup>2</sup> Clarendon Laboratory, Department of Physics, University of Oxford, Oxford OX1 3PU, United Kingdom.

<sup>3</sup> School of Sustainable Energy and Resources, Nanjing University, Suzhou, People's Republic of China

<sup>4</sup> Manchester University

<sup>5</sup> London South Bank University

<sup>6</sup> Department of Mechanical Engineering, The University of Hong Kong, Hong Kong, 999077, China

**This file includes:**

**Supplementary Figures S1-S18**

Figure S1: *Ultraviolet photoelectron spectroscopy of perovskite and ZnO/PEIE layers.*

Figure S2: *UV-VIS spectra of ZnO, TFB and CsPbI<sub>3-x</sub>Br<sub>x</sub>.*

Figure S3: *Response time of the photomultiplier tube detector.*

Figure S4: *Device properties of the PeLED used.*

Figure S5: *J-V curve and steady-state charge-induced absorption spectrum of the device with TFB or ZnO/PEIE layer only.*

Figure S6: *Temporal evolution of femtosecond transient absorption spectroscopy signal (fs-TAS) in PeLED device without electrical pump bias.*

Figure S7: *fs-TAS spectra of different device-layer stacks.*

Figure S8: *Injection-time dependence push-induced signals in PeLED devices.*

Figure S9: *Controlling PeLED device with hole-blocking layers with IR assisted electrical injection.*

30 *Figure S10: Temporal evolution of  $E_{\text{pump-IRpush-VISprobe}}$  spectrum with different pump-*  
31 *push time at a push-probe time of 20 to 60 ps averaged in the device with hole-blocking layers.*

32 *Figure S11: Temporal evolution of  $E_{\text{pump-IRpush-VISprobe}}$  spectrum with different pump-*  
33 *push time at a push-probe time of 20 to 60 ps averaged in the device with electron-blocking*  
34 *layers.*

35 *Figure S12: Push effect on EL at Pump-off conditions for PeLED device.*

36 *Figure S13: Timing reference for the IR push pulse measured using an IR-viewing card.*

37 *Figure S14 Control fs-TAS measurement on multi-stack devices at different conditions.*

38 *Figure S15: Electrochemical impedance spectroscopy (EIS) results of the PeLED device.*

39 *Figure S16: Overshot effect captured in time-resolved electroluminescence (TREL) at biases*  
40 *with different pulse durations.*

41 *Figure S17: fs-TAS on TFB, ZnO and  $\text{CsPbI}_{3-x}\text{Br}_x$  films.*

42 *Figure S18: Simulated spatiotemporal carrier-density maps in the*  
43 *Au/TFB/ $\text{CsPbBrI}_2$ /ZnO/ITO device under electrical excitation, with and without the IR push*  
44 *pulse.*

45 **Supplementary note 1: Impedance spectroscopy of the PeLED devices**

46 **Supplementary Note 2: Simulation Result**

47 **Supplementary Note 3: Self-Consistent Full-Device Drift-Diffusion Model for Push-Assisted**  
48 **Charge Injection and the  $\Delta\text{EL}$  Response**

49 **Table S1: Fixed layer properties used in the full-device simulation.**

50 **Table S2: Fixed experimental timing and numerical settings used in the transient simulations.**

51

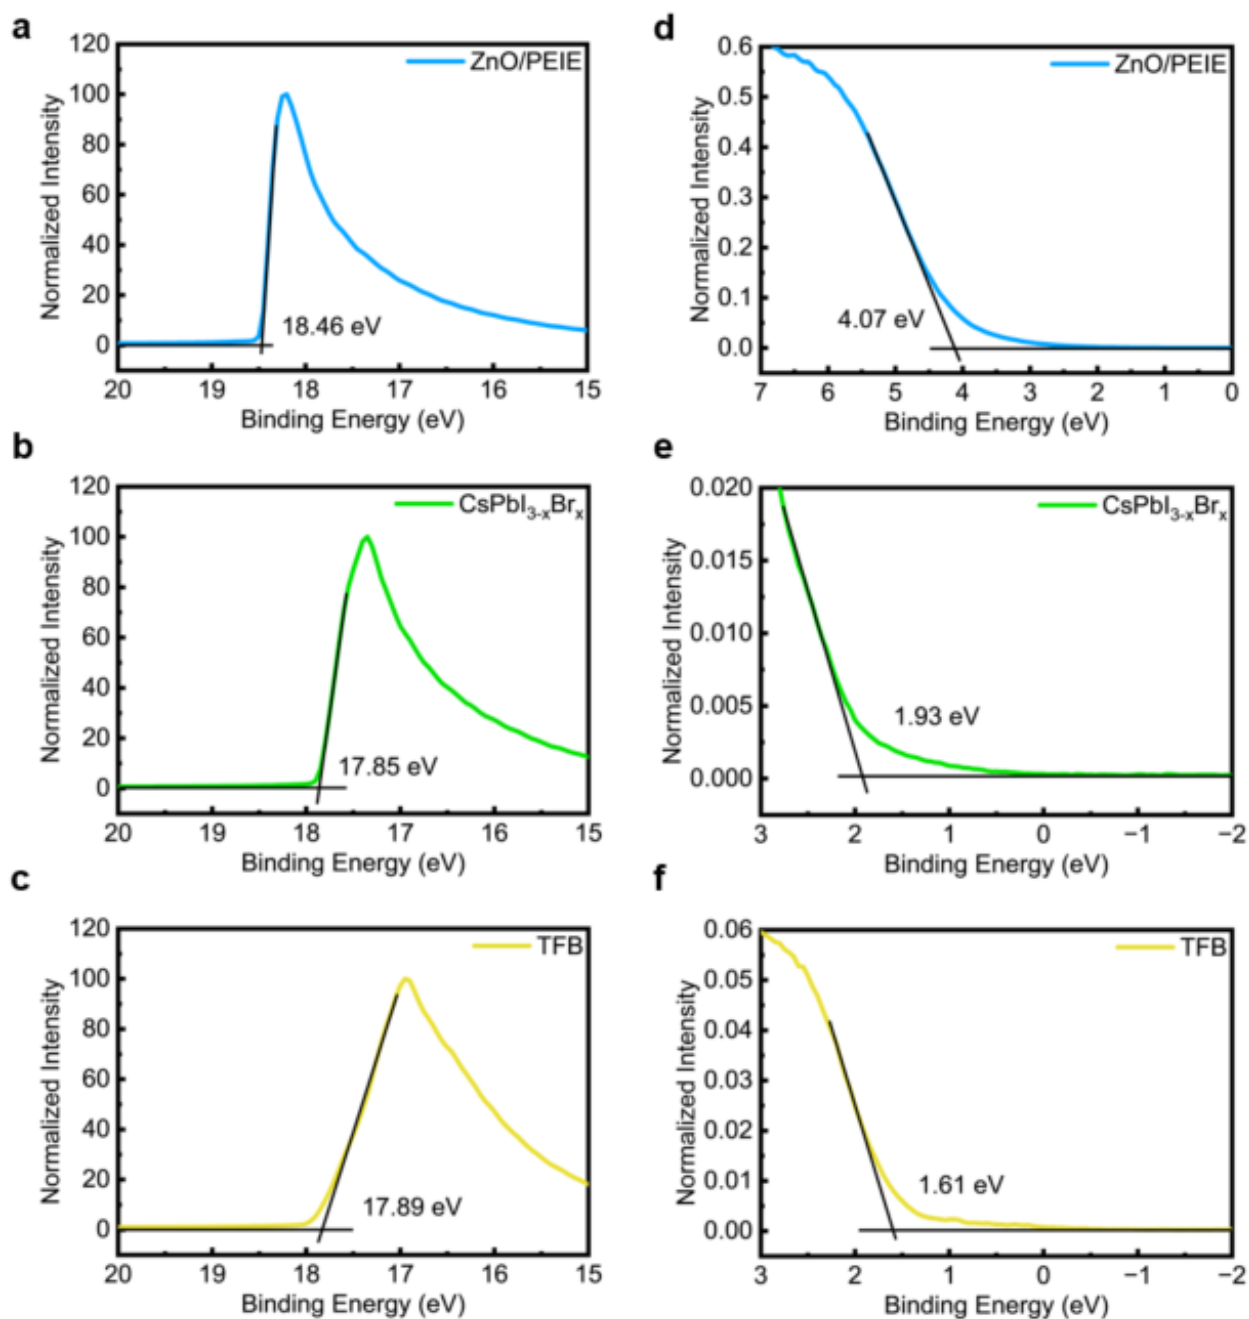

52

53 **Figure S1.** Ultraviolet photoelectron spectroscopy of perovskite and ZnO/PEIE layers. The  
 54 samples are excited with a He I radiation source with photon energy of 21.22 eV. The calculated  
 55 valance bands were -6.83 eV, -5.30 eV and -4.94 eV for ZnO/PEIE, CsPbI<sub>3-x</sub>Br<sub>x</sub>, and TFB devices,  
 56 respectively.

57

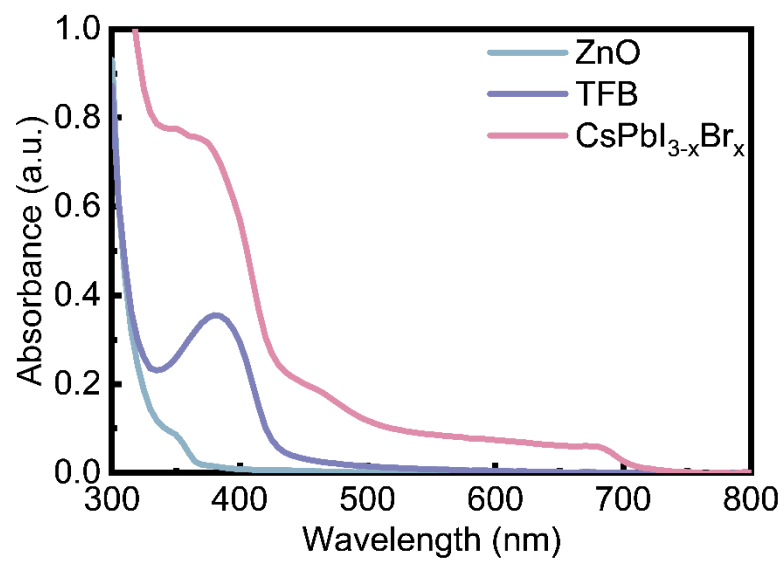

58

59 *Figure S2. UV-VIS spectra of ZnO, TFB and CsPbI<sub>3-x</sub>Br<sub>x</sub>.*

60

61

62

63

64

65

66

67

68

69

70

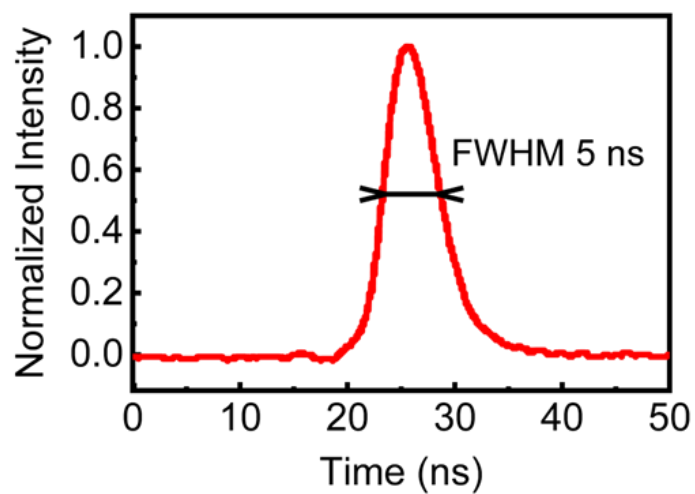

71

72 **Figure S3. Response time of the photomultiplier tube detector.** It was used to collect all the signals  
73 in this work. The signal was captured by the oscilloscope

74

75

76

77

78

79

80

81

82

83

84

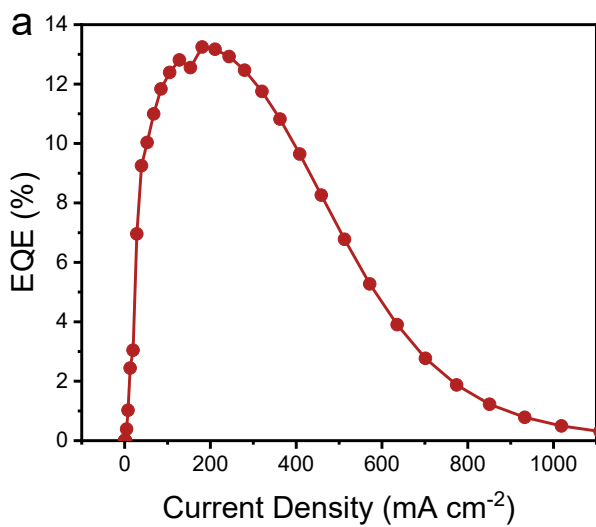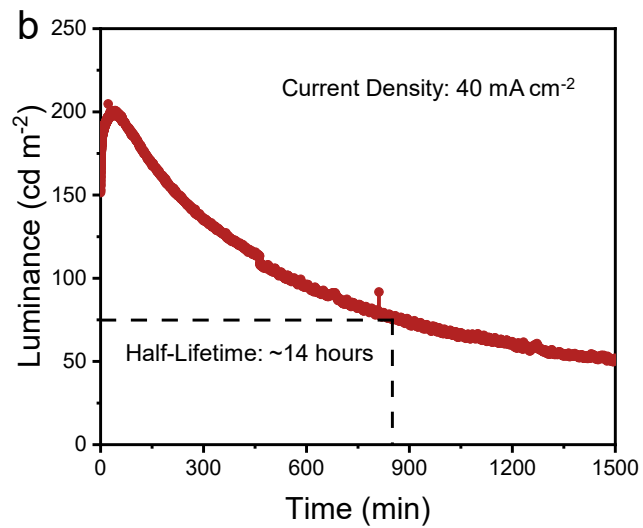

85

86 **Figure S4. Device properties of the PeLED used. (a) Current density versus EQE curve. (b) Device**  
 87 **operational stability under constant current injection of 40 mA cm<sup>-2</sup>.**

88

89

90

91

92

93

94

95

96

97

98

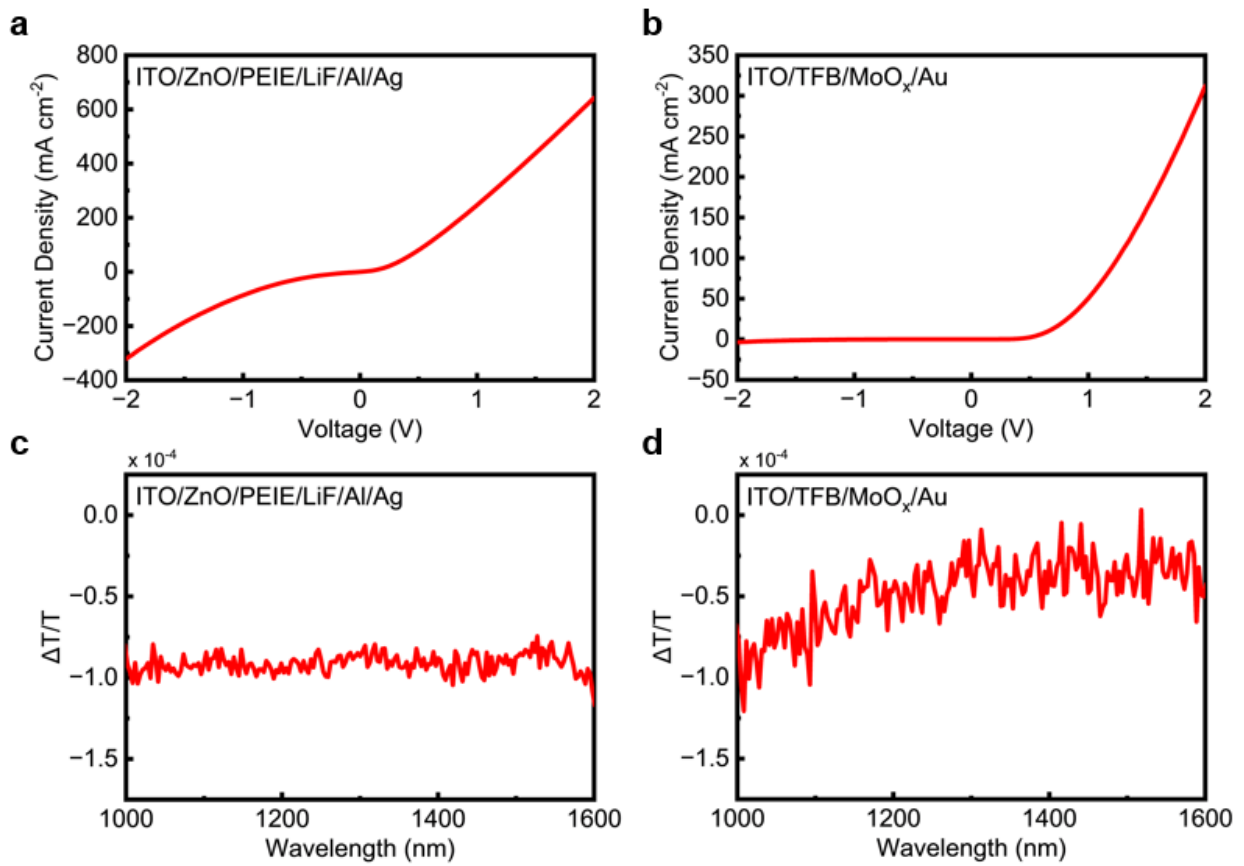

99

100 **Figure S5. J-V curve and steady-state charge-induced absorption spectrum of the device with**  
 101 **TFB or ZnO/PEIE layer only. a** The electron-only device of ITO/ZnO/LiF/Al/Ag is quasi-ohmic. **b**  
 102 the hole-only device of ITO/TFB/MoO<sub>x</sub>/Au functions as a diode. **c** Steady-state electron absorption  
 103 spectrum of the ITO/ZnO/LiF/Al/Ag device at 2 V. **d** Steady-state hole absorption spectrum of  
 104 ITO/TFB/MoO<sub>x</sub>/Au device at 2 V.

105

106

107

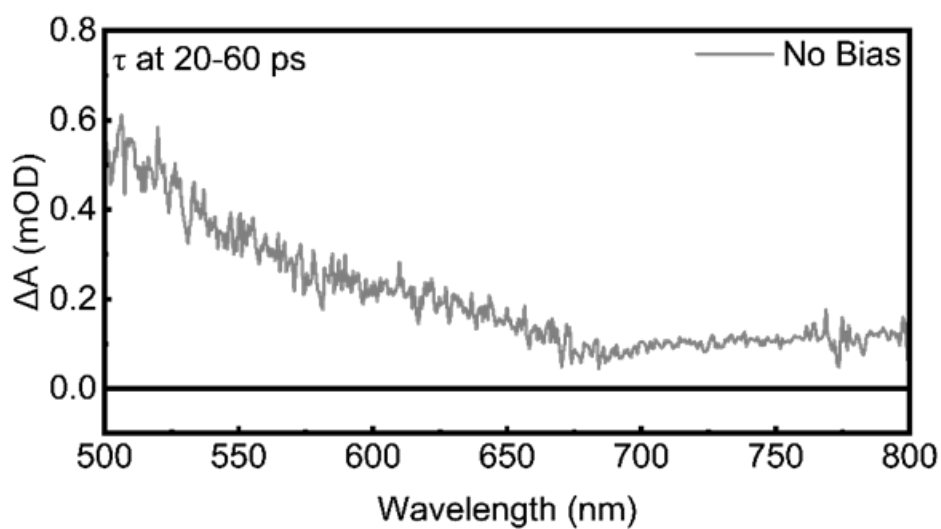

108

109 ***Figure S6. Temporal evolution of femtosecond transient absorption spectroscopy signal (fs-TAS)***  
110 ***in PeLED device without electrical pump bias. The excitation is 1300 nm with a fluence of 1.0 mJ***  
111 ***cm<sup>-2</sup>. In the absence of bias, the signal raised from the heating of Au electrode and the characteristic***  
112 ***band-edge response from the perovskite layer is absent.***

113

114

115

116

117

118

119

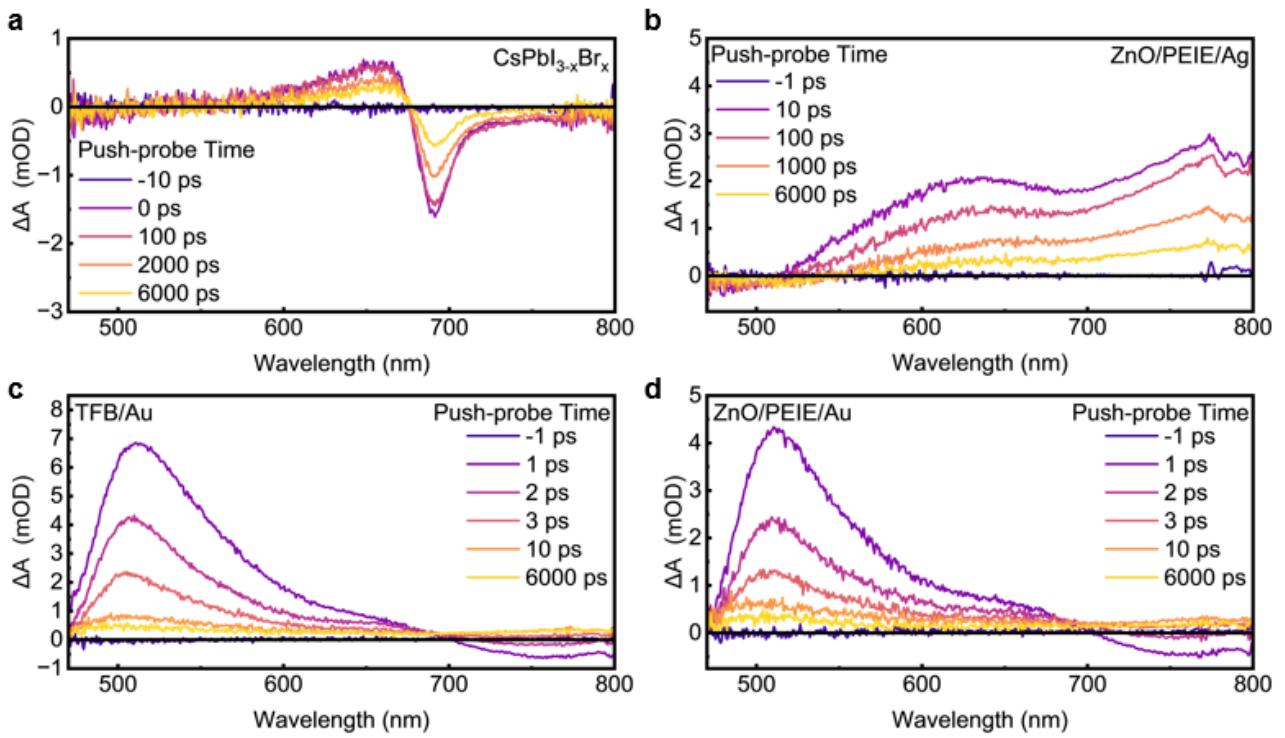

120

121 **Figure S7. fs-TAS spectra of different device-layer stacks.** Temporal evolution of fs-TAS spectrum  
 122 in (a)  $\text{CsPbI}_{3-x}\text{Br}_x$  film, (b) ZnO/PEIE/Ag tri-layer, (c) TFB/Au bi-layer, (d) ZnO/PEIE/Au tri-layer.  
 123 The push wavelength is 1300 nm with the fluence of  $10.6 \text{ mJ cm}^{-2}$  in  $\text{CsPbI}_{3-x}\text{Br}_x$  film (to trigger multi-  
 124 photon absorption),  $6.4 \text{ mJ cm}^{-2}$  in ZnO/PEIE/Ag,  $8.8 \text{ mJ cm}^{-2}$  in TFB/Au, and  $6.4 \text{ mJ cm}^{-2}$  in  
 125 ZnO/PEIE/Au. Comparing the features in different samples suggests that the photoinduced  
 126 absorption (PIA) signal around 510 nm comes from the Au electrode.

127

128

129

130

131

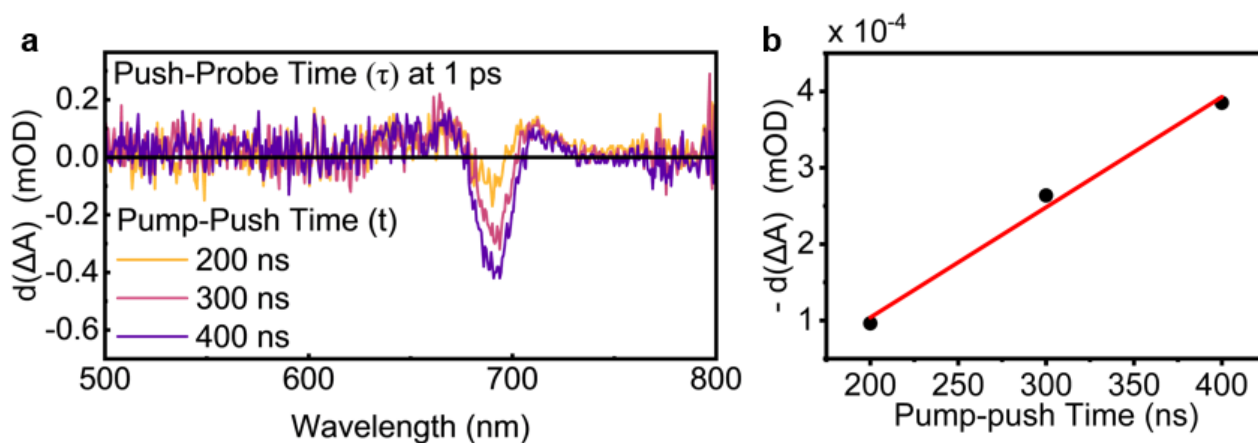

132

133 **Figure S8. Injection-time dependence push-induced signals in PeLED devices.** *a* Temporal  
 134 spectrum of  $d(\Delta A)$  at different pump-push time. It suggests that when gradually increasing pump-push  
 135 time, i.e., allowing more time for charge injections from electrical pulsed bias before push arriving,  
 136 more accumulated carriers can be pushed into perovskite layers to contribute to push-induced signals.  
 137 The pump source has a voltage of 5 V and a duration of 500 ns. The push light has a wavelength of  
 138 1300 nm and a fluence of  $1.0 \text{ mJ cm}^{-2}$ . **b** The average absolute value from 688 nm to 693 nm of  $d(\Delta A)$   
 139 at different pump-push time. The trend shows that  $d(\Delta A)$  has a linear relationship with pump-push  
 140 time.

141

142

143

144

145

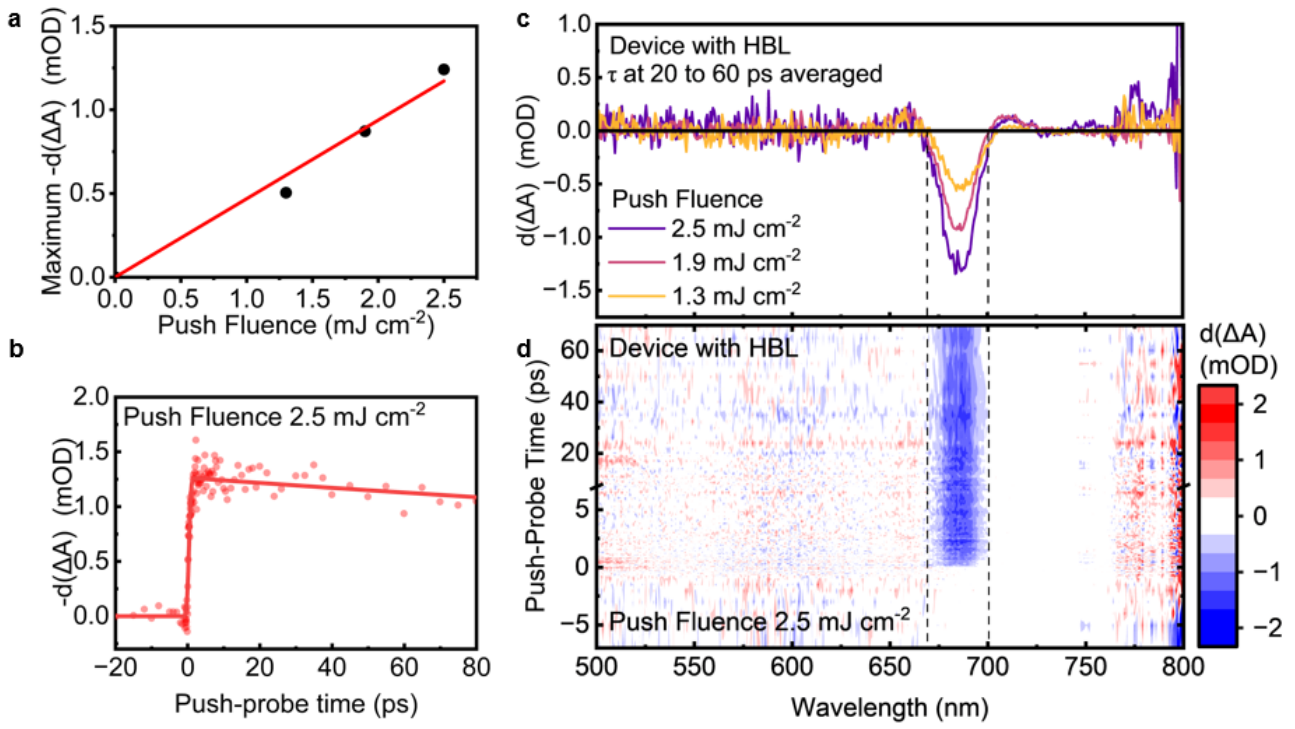

146

147 **Figure S9. Controlling PeLED device with hole-blocking layers with IR assisted electrical**  
 148 **injection. a** Push fluence dependence of maximum IR-induced signals. **b** Kinetics of push-induced  
 149 signals under a push wavelength of 1300 nm and a fluence of  $2.5 \text{ mJ cm}^{-2}$ . **c** Push fluence dependence  
 150 of push-induced signals at an averaged push-probe time of 20 to 60 ps. **d** Spectrogram of push-  
 151 induced signals at a push fluence of  $2.5 \text{ mJ cm}^{-2}$ .

152

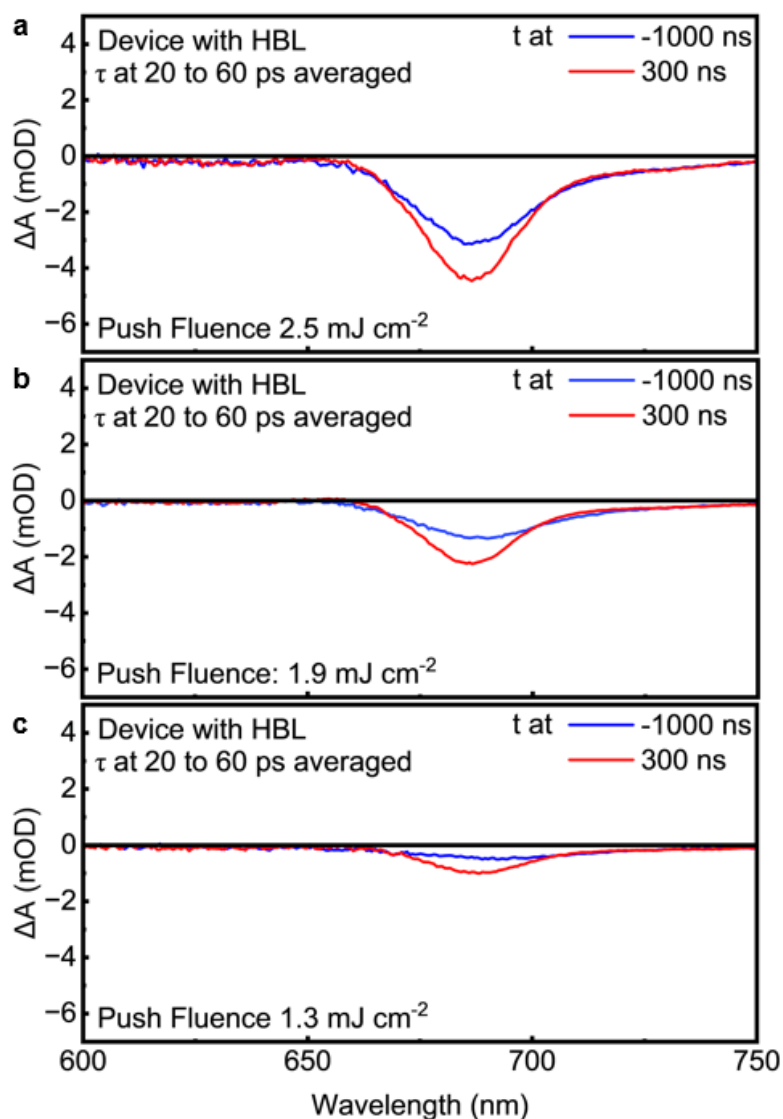

153

154 **Figure S10. Temporal evolution of  $E_{\text{pump}}\text{-IR}_{\text{push}}\text{-VIS}_{\text{probe}}$  spectrum with different pump-push**  
 155 **time at a push-probe time of 20 to 60 ps averaged in the device with hole-blocking layers. The push**  
 156 **source is 1300 nm with fluence of (a)  $2.5 \text{ mJ cm}^{-2}$ , (b)  $1.9 \text{ mJ cm}^{-2}$ , (c)  $1.3 \text{ mJ cm}^{-2}$ . The electrical**  
 157 **pump is a pulsed bias with the voltage of 5 V and the duration of 500 ns. Devices containing blocking**  
 158 **layers showed lower signal-to-noise ratios than the standard PeLEDs, so higher IR push fluences**  
 159 **were required to resolve the field-dependent injection signal. Under these conditions, a weak band-**  
 160 **edge-like background is also observed at negative pump-push delay, where the IR pulse arrives before**  
 161 **the electrical bias pulse. This background may arise from weak multiphoton excitation of the**  
 162 **perovskite layer enhances by additional blocking-layer interfaces. The injection-related contribution**  
 163 **was therefore identified from the systematic increase of the band-edge bleach at positive pump-push**  
 164 **delay, where electrically accumulated carriers are present and can be perturbed by the IR push pulse.**

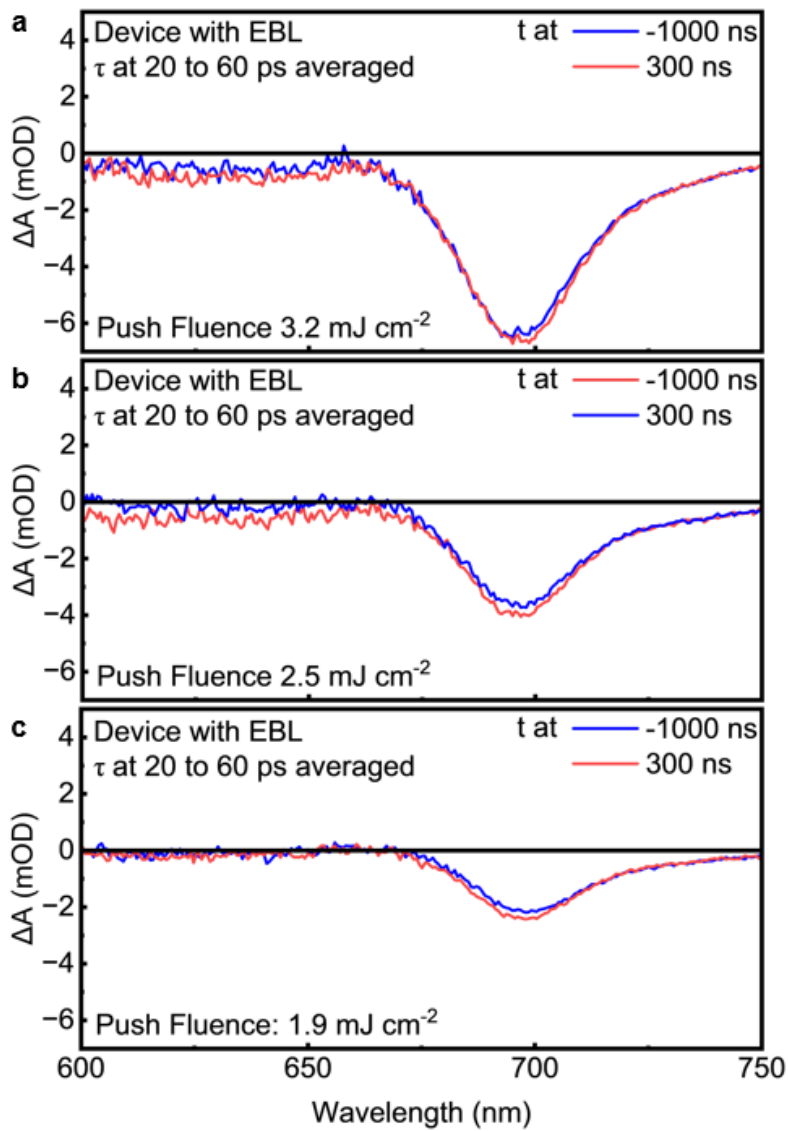

165

166 **Figure S11. Temporal evolution of  $E_{\text{pump}}\text{-IR}_{\text{push}}\text{-VIS}_{\text{probe}}$  spectrum with different pump-push**  
 167 **time at a push-probe time of 20 to 60 ps averaged in the device with electron-blocking layers. The**  
 168 **push source is 1300 nm at an IR push fluence of (a)  $3.2 \text{ mJ cm}^{-2}$ , (b)  $2.5 \text{ mJ cm}^{-2}$ , (c)  $1.9 \text{ mJ cm}^{-2}$ . The**  
 169 **electrical pump is a pulsed bias with the voltage of 5 V and the duration of 500 ns. Devices containing**  
 170 **blocking layers showed lower signal-to-noise ratios than the standard PeLEDs, so higher IR push**  
 171 **fluences were required to resolve the field-dependent injection signal. Under these conditions, a weak**  
 172 **band-edge-like background is also observed at negative pump-push delay, where the IR pulse arrives**  
 173 **before the electrical bias pulse. This background may arise from weak multiphoton excitation of the**  
 174 **perovskite layer enhances by additional blocking-layer interfaces. The injection-related contribution**  
 175 **was therefore identified from the systematic increase of the band-edge bleach at positive pump-push**  
 176 **delay, where electrically accumulated carriers are present and can be perturbed by the IR push pulse.**

177

178

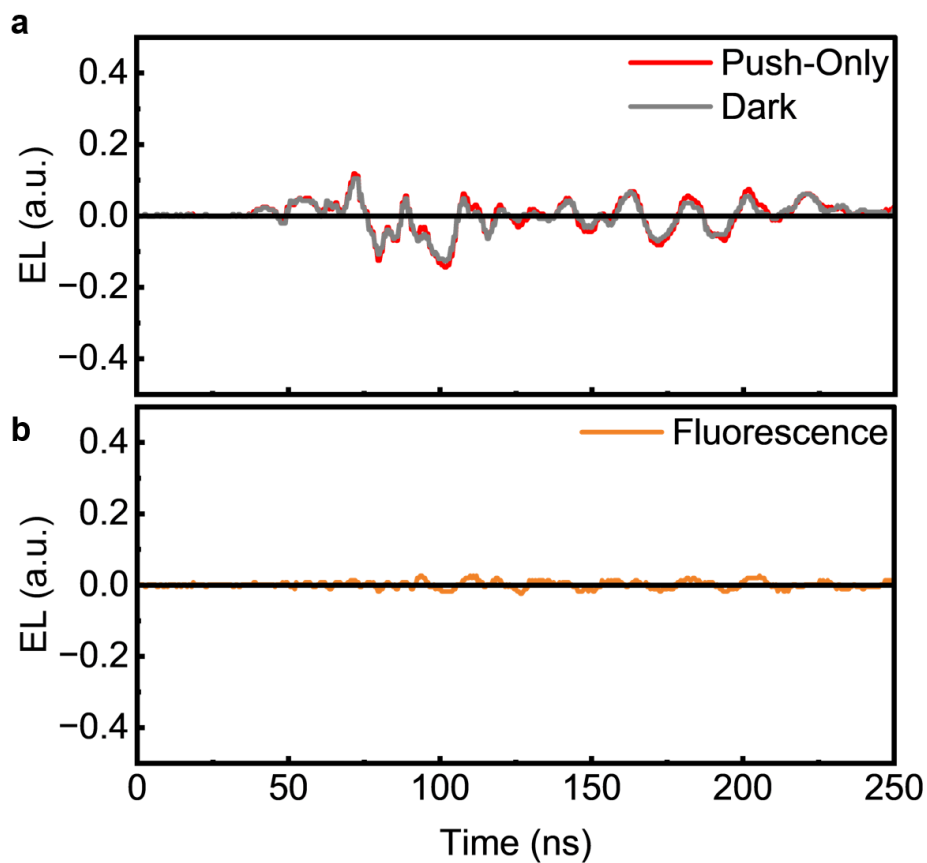

179

180 **Figure S12. Push effect on EL at Pump-off conditions for PeLED device. a** Push-only and dark EL  
 181 signal and detected by PMT and oscilloscope. The push wavelength and fluence are 1064 nm and  
 182 11.1 mJ cm<sup>-2</sup> respectively. **b** Difference between 'push-only' and 'dark' signals. This shows that IR  
 183 push itself does not generate PL/EL signals.

184

185

186

187

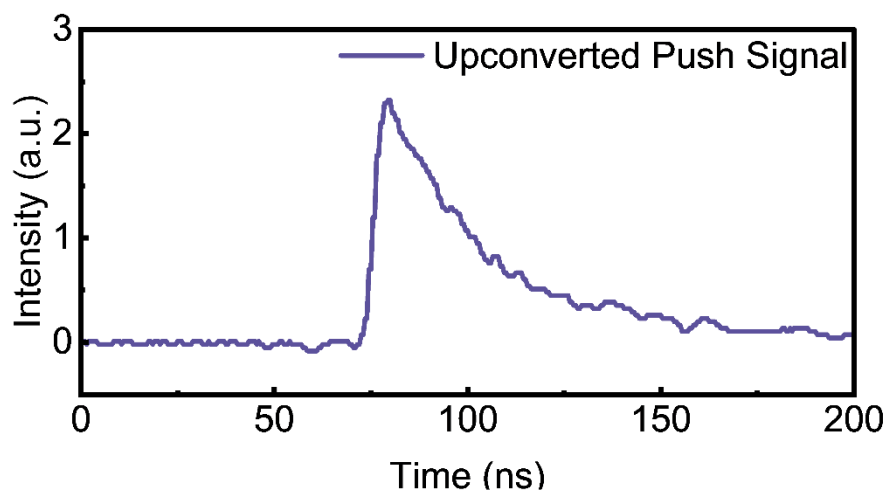

188

189 **Figure S13. Timing reference for the IR push pulse measured using an IR-viewing card.** The 1064  
190 nm push pulse was blocked from directly reaching the detector. To determine its arrival time, an IR-  
191 viewing card was placed at the sample position, where the incident IR pulse generated visible  
192 emission through up-conversion/fluorescence from the card. This visible signal was detected with the  
193 same photomultiplier/oscilloscope setup used for the time-resolved EL measurements. The rising edge  
194 of the detected signal therefore provides an approximate timing reference for the arrival of the IR  
195 push pulse at the sample position. The push wavelength and fluence were 1064 nm and  $11.1 \text{ mJ cm}^{-2}$ ,  
196 respectively.

197

198

199

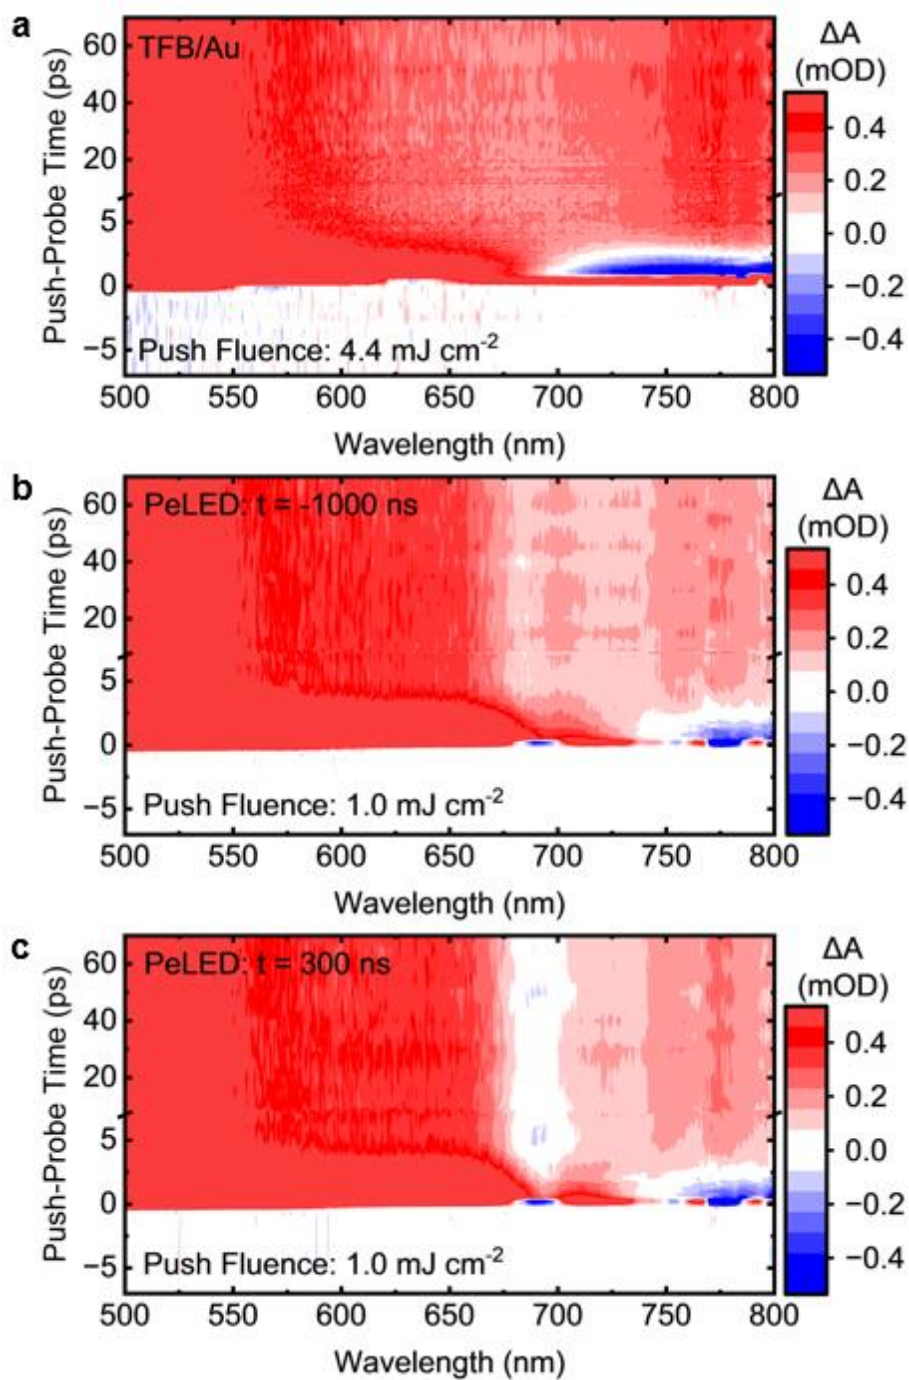

200

201 **Figure S14. Control fs-TAS measurement on multi-stack devices at different conditions.** *a* fs-TAS  
 202 on TFB/Au bi-layer under no bias condition. The push beam has a wavelength of 1300 nm and a  
 203 fluence of  $4.4 \text{ mJ cm}^{-2}$ . **b** a fs-TAS on PeLED under an electrical pump (5 V, duration 500 ns) at pump-  
 204 push time of -1000 ns. The push beam has a wavelength of 1300 nm and a fluence of  $1.0 \text{ mJ cm}^{-2}$ . **c** a  
 205 fs-TAS on PeLED under an electrical pump (5 V, duration 500 ns) at a pump-push time of 300 ns. The  
 206 push beam has a wavelength of 1300 nm and a fluence of  $1.0 \text{ mJ cm}^{-2}$ .

207

208

209 **Supplementary note 1. Impedance spectroscopy of the PeLED devices.**

210 Electrical impedance spectroscopy was performed to characterise the conventional electrical response  
211 of the PeLED device under different forward-bias conditions (Fig. S15). The impedance was  
212 measured from 1.0 to 3.5 V, covering both the sub-threshold regime and the regime after EL turn-on,  
213 which occurs at approximately 2 V. The extracted capacitance shows a strong dependence on both  
214 frequency and applied bias. At low bias, before turn-on, the device exhibits a very large low-frequency  
215 capacitance, consistent with the accumulation of charge at internal interfaces and/or slow  
216 redistribution processes in the device stack. At high frequencies, however, the capacitance converges  
217 towards a bias-independent value of approximately 1–2 nF. This value is close to the geometrical  
218 capacitance estimated from the device area and thickness, supporting the interpretation that the high-  
219 frequency response is dominated by the physical capacitance of the device stack rather than by slow  
220 interfacial charging processes. Using the measured high-frequency imaginary impedance, the  
221 geometrical capacitance was estimated as  $C_g = 1/(2\pi f(-Z'')) \approx 1.25\text{nF}$ . A similar value is obtained  
222 from the parallel-plate estimate,  $C = \epsilon\epsilon_0 A/d$ , using a device area of 4 mm<sup>2</sup>, an active stack thickness  
223 of approximately 375 nm, and a relative dielectric constant of  $\epsilon \sim 20$ , which gives  $C \approx 1.9\text{nF}$ .

224 The Nyquist plots further show a strong reduction in the characteristic time after device turn-on.  
225 Below turn-on, at 1.0 and 1.5 V, the impedance arcs are very large, indicating a high device resistance  
226 and slow electrical relaxation. The characteristic times extracted from the impedance spectra are 51.7  
227 ms at 1.0 V and 719  $\mu\text{s}$  at 1.5 V. Once the device reaches the EL operating regime, the impedance  
228 arcs become much smaller and the characteristic time decreases rapidly with increasing bias: 19.4  $\mu\text{s}$   
229 at 2.0 V, 7.1  $\mu\text{s}$  at 2.5 V, 2.8  $\mu\text{s}$  at 3.0 V, and 1.4  $\mu\text{s}$  at 3.5 V. This trend is consistent with the opening  
230 of an efficient injection/recombination pathway after turn-on, which reduces the differential  
231 resistance of the device and accelerates the macroscopic electrical response. At the highest bias, the  
232 extracted characteristic time approaches the value expected from a simple RC estimate. Taking  $C_g \approx$   
233 1.25nF and the high-frequency real impedance including the 50  $\Omega$  load resistance gives  $RC \approx 223\text{ns}$ ,  
234 corresponding to a rise time of approximately  $5RC \approx 1.1 \mu\text{s}$ . This is close to the measured  
235 characteristic time of 1.4  $\mu\text{s}$  at 3.5 V, indicating that under high forward bias the macroscopic  
236 electrical response of the device approaches an RC-limited regime.

237 This slow electrical relaxation is consistent with the time-resolved EL measurements under pulsed  
238 bias. As the electrical pulse duration is increased from 100 to 220 ns, the EL transient progressively  
239 grows and approaches a quasi-steady response only for pulse durations of approximately 200 ns and  
240 longer, indicating that the injected carrier population and associated space-charge distribution require  
241 hundreds of nanoseconds to become fully established during normal electrical operation.

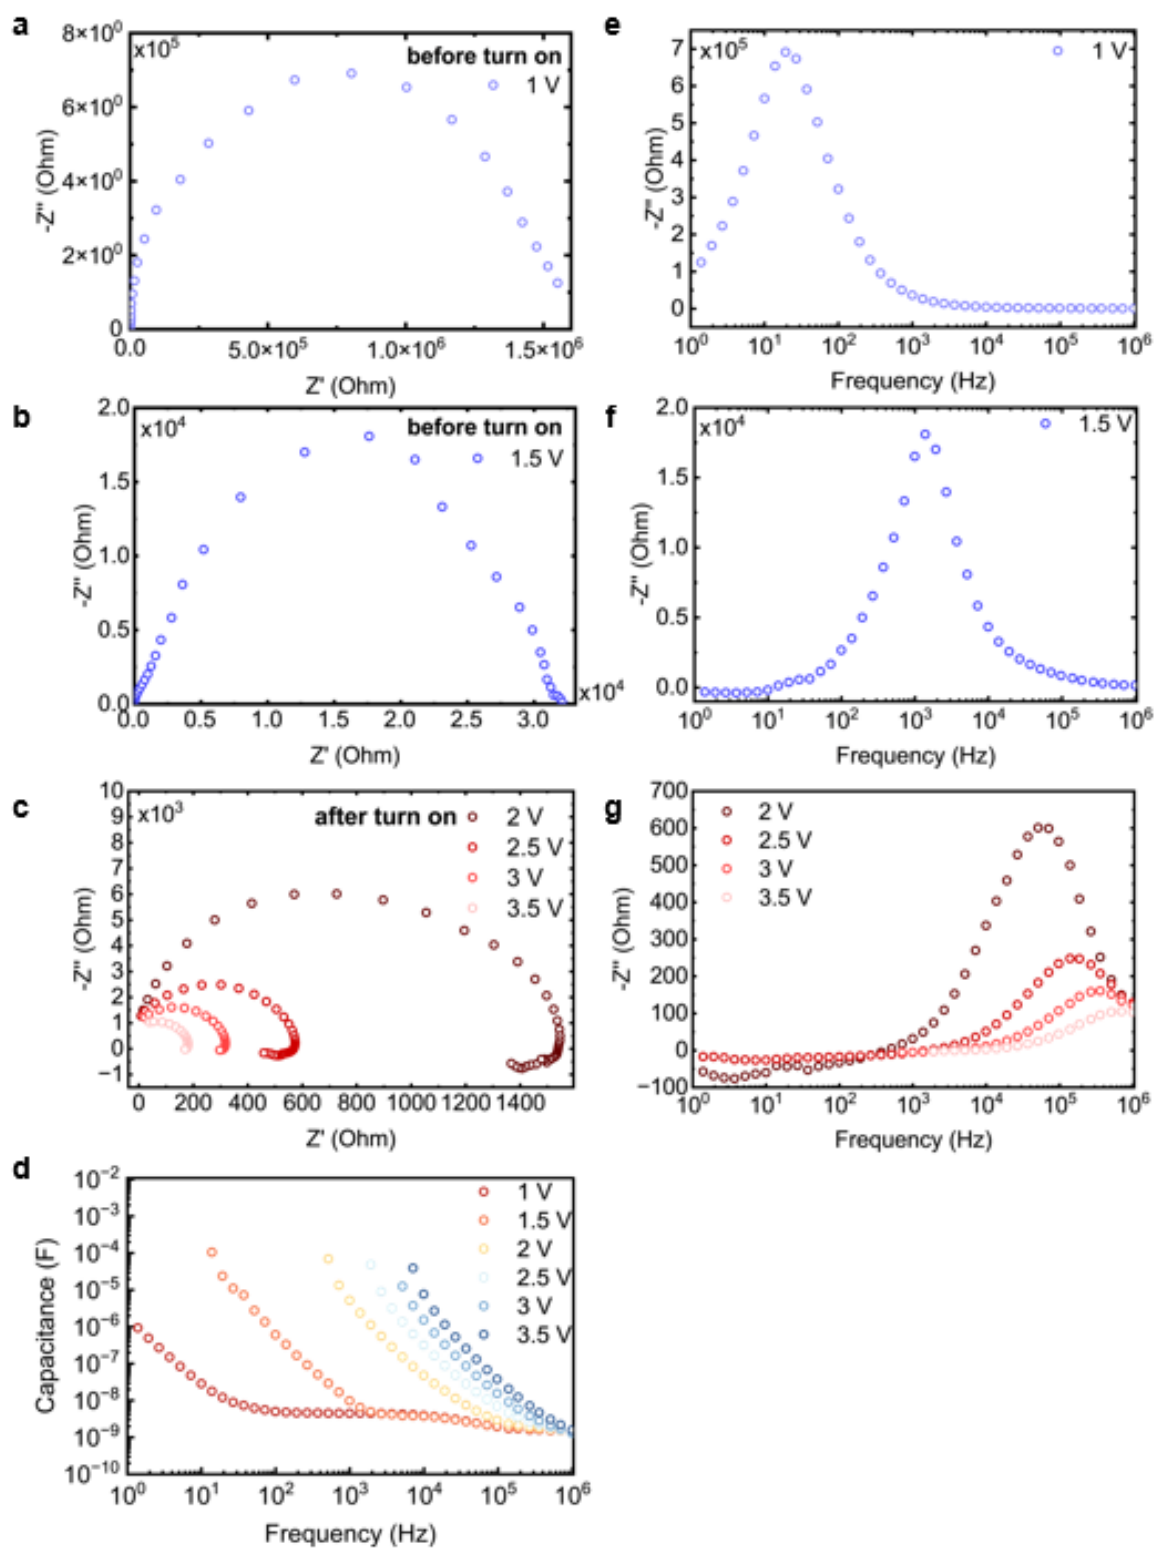

242

243 *Figure S15. Electrochemical impedance spectroscopy (EIS) results of the PeLED device.*

244

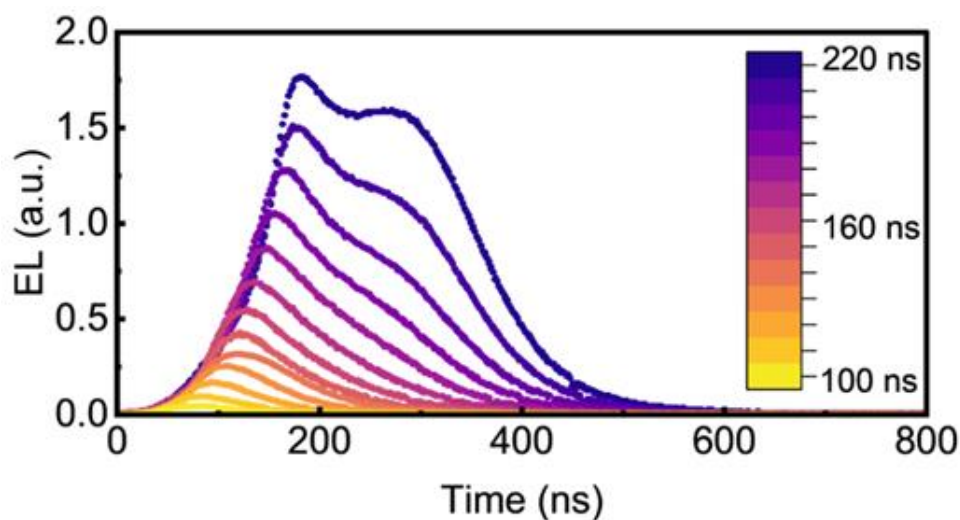

245

246 **Figure S16. Overshoot effect captured in time-resolved electroluminescence (TREL) at biases with**  
 247 **different pulse durations.** The applied bias is fixed with the voltage of 5 V. The pulse duration  
 248 increased from 100 ns to 220 ns with the interval of 10 ns. As the pulse duration is increased, an  
 249 overshoot appears in the EL transient, indicating that the device response is no longer governed only  
 250 by the onset of carrier injection. Instead, longer electrical excitation allows a more developed space-  
 251 charge distribution to form within the PeLED, which modifies the internal field, carrier balance, and  
 252 recombination dynamics. The appearance of this overshoot therefore marks the transition towards a  
 253 more quasi-stationary operating regime, where the EL depends not only on injection but also on the  
 254 redistribution of accumulated charge inside the device. To isolate the effect of IR-assisted carrier  
 255 injection, the pump–push EL measurements were therefore performed using short electrical pulses,  
 256 where the device response is less affected by slow space-charge redistribution.

257

258

259

260

261

262

263

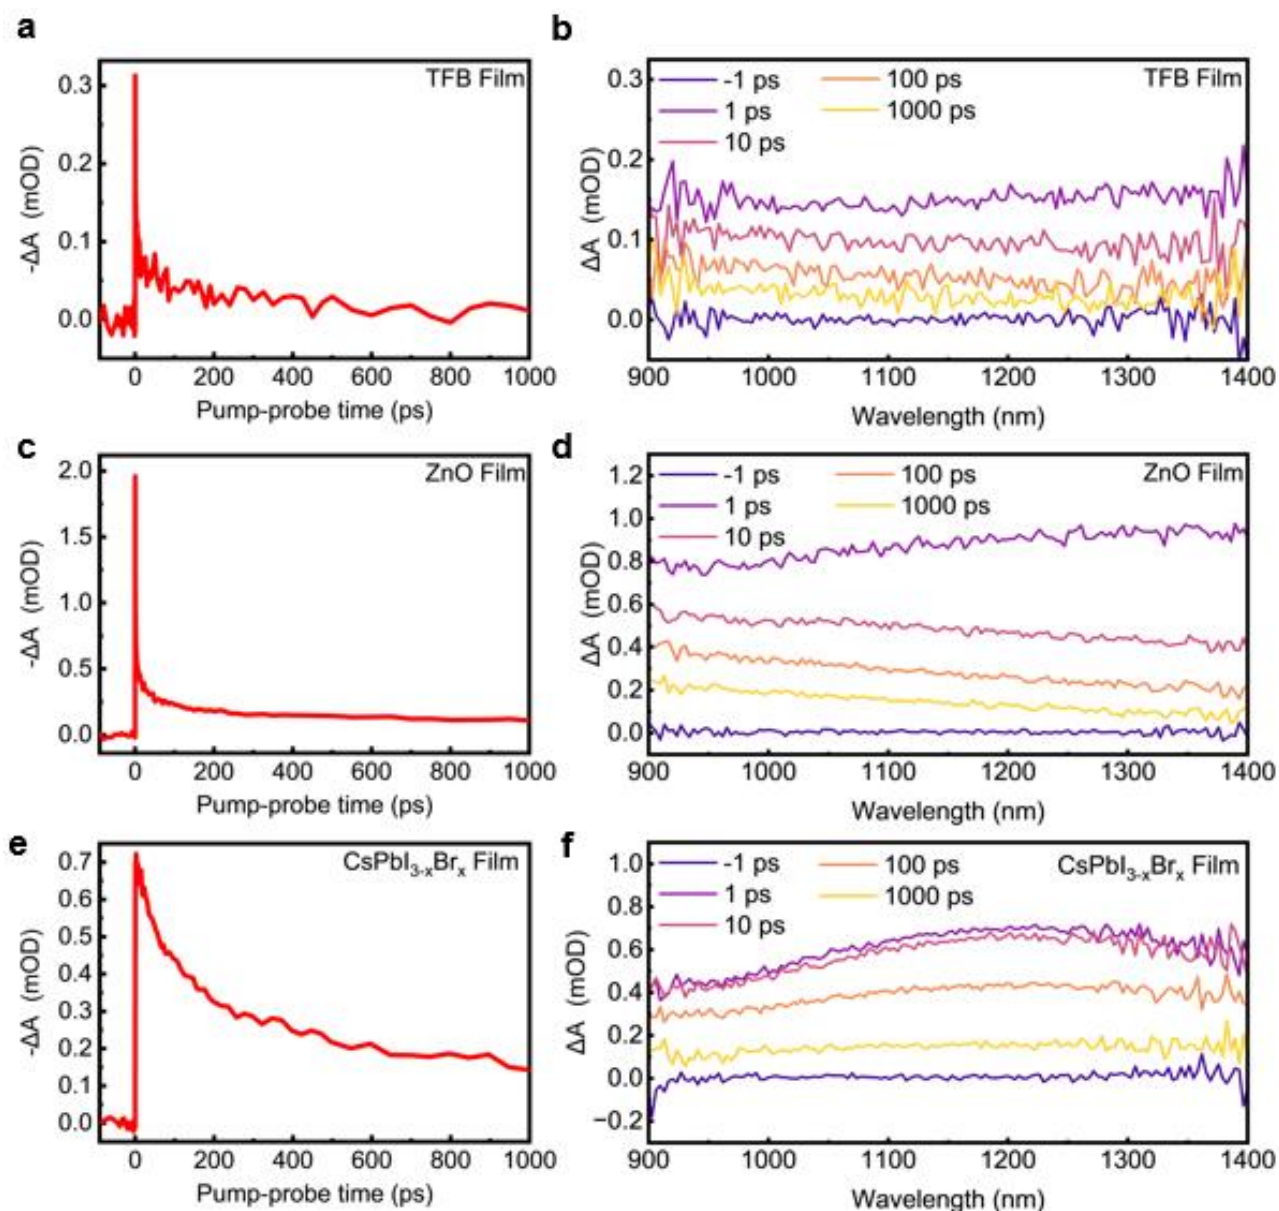

264

265 **Figure S17. fs-TAS on TFB, ZnO and CsPbI<sub>3-x</sub>Br<sub>x</sub> films.** For the measurement of TFB film, the  
 266 pump light has a wavelength of 350 nm and a fluence of 0.12 mJ cm<sup>-2</sup>. For the measurement of ZnO  
 267 film, the pump light has a wavelength of 350 nm and a fluence of 0.73 mJ cm<sup>-2</sup>. For the measurement  
 268 of CsPbI<sub>3-x</sub>Br<sub>x</sub>, the pump wavelength is 450 nm with a fluence of 20.7 μJ cm<sup>-2</sup>.

269

270

271

272

274 **Supplementary Note 2. Simulation Result**

275 **Fig. S18** shows the simulated spatiotemporal maps of the electron and hole densities in the  
276 Au/TFB/CsPbBr<sub>2</sub>/ZnO/ITO perovskite LED device during a 100 ns electrical pulse, with and without  
277 IR push. The spatial coordinate is defined from the Au/TFB side to the ZnO/ITO side, with the  
278 TFB/EML and EML/ZnO interfaces located at 80 and 155 nm, respectively. Under electrical  
279 excitation, the carrier distribution is strongly shaped by the charge-selective transport layers and by  
280 the finite, bias-dependent carrier transfer across the TFB/EML and EML/ZnO interfaces. Electrons  
281 injected from the ITO electrode into the ZnO accumulate primarily within ZnO side and near the  
282 EML/ZnO interface, forming an electron-rich space-charge reservoir adjacent to the EML. Holes  
283 injected from the Au electrode into the TFB hole-transport layer accumulate primarily within TFB  
284 and near the TFB/EML interface, forming a hole-rich region adjacent to the emissive layer. Thus,  
285 before the arrival of the IR push, the device is characterized not by a spatially homogeneous electron-  
286 hole population, but by a dynamically established interfacial carrier distribution. Radiative  
287 recombination occurs primarily in regions where electrons supplied from the ITO/ZnO side overlap  
288 with holes supplied from the Au/TFB side.

289 Comparison of the electron-density maps with and without the IR push reveals that the push pulse  
290 produces a localized and prompt perturbation of the electron population close to the EML/ZnO  
291 interface (**Fig. S18a, b**). This perturbation appears at the push arrival time and subsequently  
292 redistributes into the perovskite layer on the nanosecond timescale. Importantly, the corresponding  
293 hole-density maps are nearly unchanged by the IR push (**Fig. S18c, d**). The simulated response  
294 therefore does not require the IR pulse to create a new hole population or to globally modify hole  
295 injection from the TFB side. Instead, the IR push selectively mobilizes the pre-existing electron-side  
296 space-charge reservoir near the EML/ZnO interface, which consists of both mobile electrons and  
297 trapped electrons in the ZnO-side interfacial region. Once released from interfacial traps or driven  
298 across the interface into the adjacent perovskite region, these additional electrons overlap with the  
299 pre-established hole population in the EML. Because the local radiative recombination rate scales as  
300  $R_{\text{rad}} = Bnp$ , a spatially localized increase in  $n$  can produce a measurable transient enhancement of  
301 EL without a comparable perturbation in  $p$ . Within this framework, the prompt  $\Delta\text{EL}$  component is  
302 assigned to the immediate enhancement of local bulk radiative recombination within the EML  
303 adjacent to the EML/ZnO interface. The slower  $\Delta\text{EL}$  component reflects the subsequent transport-  
304 driven redistribution of the same push-mobilized electrons within the EML, rather than delayed hole  
305 generation or a separate balanced carrier-generation process.

306 The late-time relaxation after the electrical pulse is governed by stored charge rather than by an  
307 instantaneous removal of carriers at the external voltage turn-off. In the simulation, the falling edge  
308 of the applied pulse is treated as a finite internal-voltage relaxation, and the contact and interfacial  
309 carrier-exchange terms are smoothly reduced as the internal device voltage decays. Physically, this  
310 treatment represents the combined effects of device capacitance, finite RC discharge, interfacial  
311 barriers, and the incomplete extraction of accumulated carriers immediately after the external bias is  
312 removed. This voltage-retention treatment prevents an unphysical abrupt reset of the carrier densities  
313 at the end of the voltage pulse, while preserving the same boundary conditions for the with-push and  
314 without-push simulations. Therefore, the differential feature induced by the IR push remains  
315 attributable to the selective mobilization and redistribution of the electron-side space-charge reservoir,  
316 rather than to a change in the electrical driving waveform.

317 Together, these simulations provide a mechanistic picture for the push-induced EL enhancement.  
318 During the electrical pulse, an electron-rich reservoir builds up near the EML/ZnO interface because  
319 electron injection from the ITO/ZnO side and subsequent interfacial transfer into the perovskite are  
320 not instantaneously balanced by radiative recombination and carrier extraction. The IR push  
321 transiently mobilizes part of this stored electron population and drives additional electrons into the  
322 adjacent EML region, where holes have already penetrated from the TFB side. This produces a prompt  
323 increase in local bulk radiative recombination near the EML/ZnO interface, followed by a slower  
324 component associated with transport-driven redistribution of the same push-mobilized electrons  
325 within the EML. The absence of a corresponding perturbation in the hole-density maps supports an  
326 electron-dominated push response, consistent with the interpretation that the IR push primarily  
327 mobilizes stored electron-side charge rather than directly generating a spatially balanced electron-  
328 hole population throughout the perovskite layer.

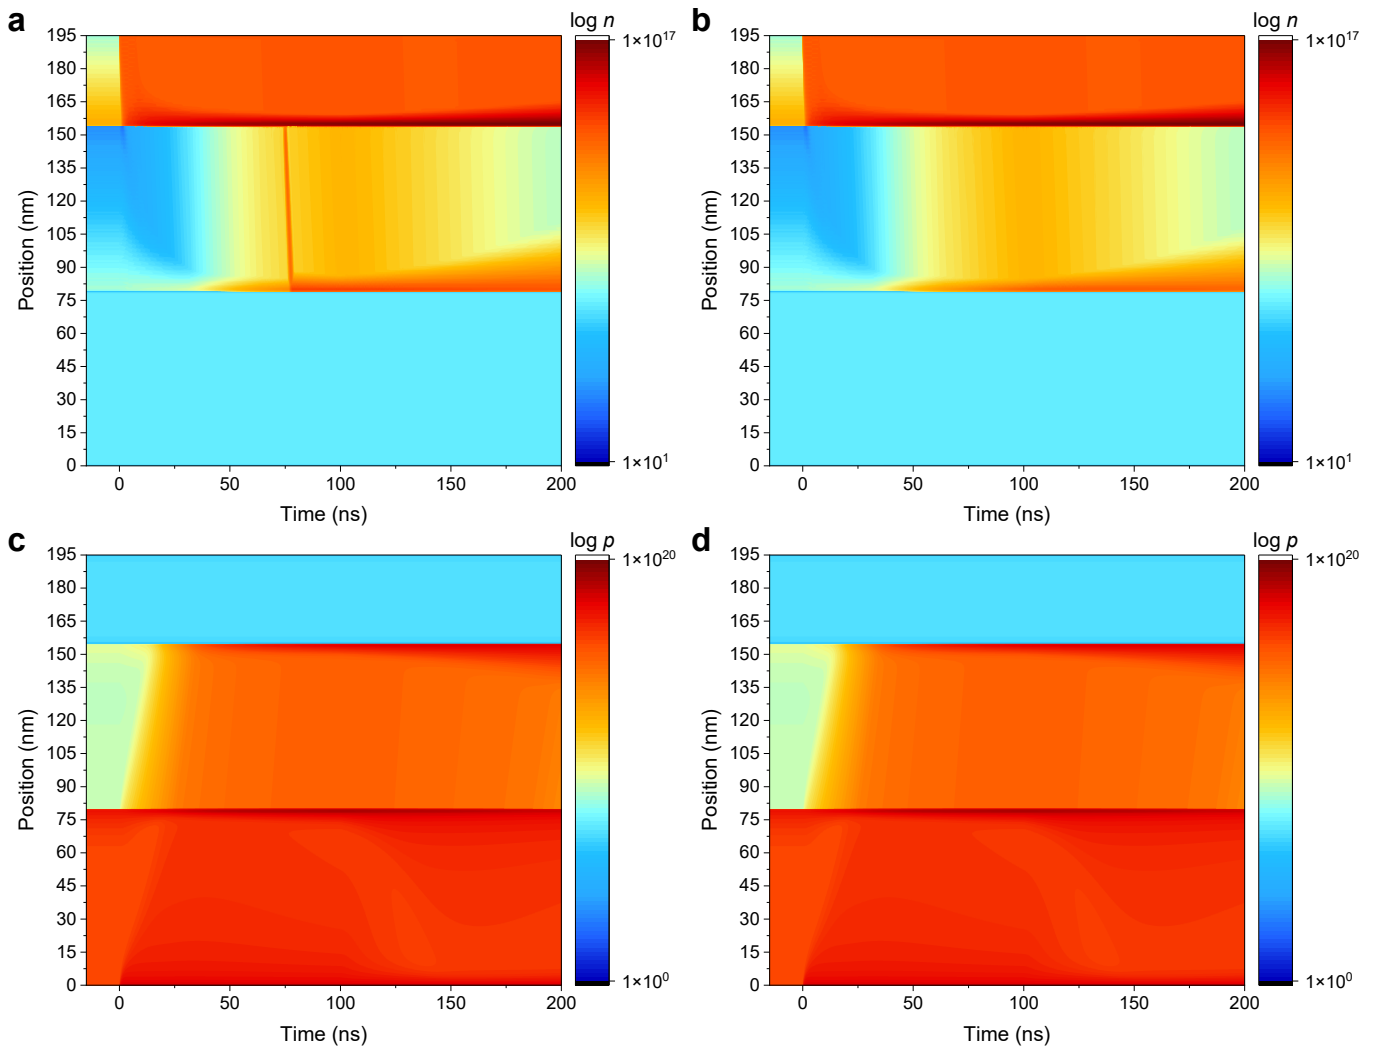

329

330 **Figure S18. Simulated spatiotemporal carrier-density maps in the Au/TFB/CsPbBrI<sub>2</sub>/ZnO/ITO**  
 331 **device under electrical excitation, with and without the IR push pulse. (a)** Simulated electron-  
 332 density map,  $\log n$ , with push. **(b)** Simulated electron-density map,  $\log n$ , without push. **(c)** Simulated  
 333 hole-density map,  $\log p$ , with push. **(d)** Simulated hole-density map,  $\log p$ , without push. The spatial  
 334 coordinate  $x$  runs from the Au/TFB side to the ZnO/ITO side, with the TFB/EML and EML/ZnO  
 335 interfaces located at 80 and 155 nm, respectively. The device is driven by a 5 V forward-bias pulse  
 336 starting at 0 ns and ending at 100 ns.

337

### 338 **Supplementary Note 3. Self-Consistent Full-Device Drift-Diffusion Model for Push-Assisted** 339 **Charge Injection and the $\Delta EL$ Response**

340 To interpret the operando electrically-pump, IR-push-induced change in electroluminescence  
341 ( $\Delta EL$ ), we developed a self-consistent one-dimensional full-device model for the  
342 Au/TFB/CsPbBr<sub>2</sub>/ZnO/ITO device. The model resolves the hole transport layer (HTL), perovskite  
343 emissive layer (EML), and electron transport layer (ETL) explicitly and solves coupled Poisson, drift-  
344 diffusion, contact-exchange, heterojunction-transfer, and interfacial-trap equations. In this model, the  
345 IR push acts on electron-side space charge accumulated near the EML/ETL interface, including both  
346 accumulated mobile electrons in the near-interfacial ETL region and trapped electrons in an interfacial  
347 trap manifold. The push transiently mobilizes these pre-existing electrons and injects them into the  
348 EML close to the interface. As a result, the prompt  $\Delta EL$  component is assigned to an immediate  
349 increase in local bulk recombination near the EML/ETL interface, while the slower component  
350 reflects the subsequent transport-driven redistribution of the same push-released electrons within the  
351 EML.

#### 352 **1. Device Structure and Simulation Setup**

353 The simulated device consists of three spatially resolved semiconductor layers: TFB (HTL; 80 nm),  
354 CsPbBr<sub>2</sub> (EML; 75 nm), and ZnO (ETL; 40 nm), sandwiched between an Au anode (work function  
355 5.30 eV) and an ITO cathode (work function 4.60 eV). The built-in potential is set by the contact  
356 work-function difference. The spatial coordinate  $x$  is defined across the device thickness from the  
357 Au/HTL side to the ETL/ITO side. In the transient simulation, the device is driven by a 5 V forward-  
358 bias pulse of 100 ns duration, and the infrared push is modeled as a 1064 nm Gaussian pulse centered  
359 at 65 ns with a full width at half maximum of 0.6 ns. Prior to the transient calculation, the device is  
360 relaxed to zero-bias equilibrium, ensuring that the electrical pulse is applied to a self-consistent  
361 stationary state rather than to an arbitrary initial carrier distribution. Carrier-map calculations are  
362 performed using  $\Delta x = 2.5$  nm and  $\Delta t = 0.01$  ns.

#### 363 **2. Governing equations**

364 Carrier transport was solved self-consistently together with Poisson's equation across the complete  
365 multilayer device. The electrostatic potential  $\phi(x, t)$  satisfies:

$$366 \quad \frac{\partial}{\partial x} \left[ \varepsilon(x) \frac{\partial \phi(x, t)}{\partial x} \right] = -q[p(x, t) - n(x, t) - n_t(x, t)] \quad (1)$$

367 where  $n(x, t)$  and  $p(x, t)$  are the mobile electron and hole densities, respectively,  $n_t(x, t)$  is the total  
 368 trapped-electron density,  $\phi(x, t)$  is the electrostatic potential, and  $\varepsilon(x)$  is the position-dependent  
 369 permittivity.

370 The mobile carriers obey the continuity equations:

$$371 \quad \frac{\partial n}{\partial t} = -\frac{\partial \Gamma_n}{\partial x} - B_{\text{rad}}(x) n(x, t) p(x, t) - C_{\text{trap}} + R_{\text{th}} - S_{\text{push,free}} + S_{\text{push,inj}} \quad (2)$$

$$378 \quad \frac{\partial p}{\partial t} = -\frac{\partial \Gamma_p}{\partial x} - B_{\text{rad}}(x) n(x, t) p(x, t) \quad (3)$$

372 where  $\Gamma_n$  and  $\Gamma_p$  are the electron and hole fluxes, respectively.  $B_{\text{rad}}(x)$  is the bimolecular radiative  
 373 recombination coefficient, taken to be nonzero only within the perovskite EML.  $C_{\text{trap}}$  describes free-  
 374 electron capture into the interfacial trap manifold, whereas  $R_{\text{th}}$  represents thermal release from the  
 375 same manifold.  $S_{\text{push,free}}$  accounts for the push-induced removal of mobile electron-side space  
 376 charge from the ETL region, and  $S_{\text{push,inj}}$  represents reinjection of the total push-released charge into  
 377 the EML through a near-interface source term.

379 The transport fluxes were evaluated using the Scharfetter-Gummel discretization with layer-  
 380 dependent mobilities and transport potentials. This discretization is widely used for semiconductor  
 381 drift-diffusion calculations because it remains numerically stable under conditions of strong  
 382 electrostatic gradients and heterojunction energy offsets. For electrons, the transport potential was  
 383 written as  $\psi_n = \phi + \chi + V_T \ln(N_C)$ , whereas for holes it was written as  $\psi_p = \phi + IP - V_T \ln(N_V)$ ,  
 384 where  $\chi$  is the electron affinity,  $IP$  is the ionization potential, and  $V_T = k_B T/q$ . This formulation  
 385 provides stable carrier fluxes across the multilayer device and avoids numerical artifacts at material  
 386 interfaces.

### 387 **3. Contacts, heterojunction transfer, voltage-dependent retention, and** 388 **equilibrium initialization**

389 The metal contacts were modeled as finite-rate carrier-exchange boundaries rather than ideal  
 390 reservoirs with fixed carrier densities. Under forward bias, hole exchange at the Au/TFB contact and  
 391 electron exchange at the ZnO/ITO contact dominate the injection response, whereas the  
 392 corresponding minority-carrier exchange terms were retained to allow finite leakage-like exchange  
 393 and to avoid singular boundary conditions. The contact exchange fluxes were scaled by the  
 394 instantaneous internal device voltage, so that carrier exchange with the electrodes decreases  
 395 continuously as the device discharges after the electrical pulse. This treatment avoids an unphysical

396 abrupt reset of the carrier densities at the voltage turn-off and allows accumulated carriers to relax  
397 through finite recombination, transport, and extraction processes.

398 Carrier transfer across the TFB/EML and EML/ZnO heterojunctions was described by explicit field-  
399 assisted interfacial transfer terms in addition to the Scharfetter-Gummel drift-diffusion fluxes within  
400 each layer. At the TFB/EML interface, hole transfer from TFB into the EML was governed by a finite  
401 transfer velocity and an effective barrier associated with the ionization-potential offset. At the  
402 EML/ZnO interface, electron transfer from ZnO into the EML was treated analogously using a finite  
403 electron-transfer velocity and the conduction-band offset. In both cases, the interfacial electric field  
404 reduces the effective transfer barrier through a phenomenological field-assistance term,  $\Delta E_{\text{field}} =$   
405  $\beta\sqrt{E_{\text{int}}}$ , where  $\beta$  is an empirical field-assistance parameter and  $E_{\text{int}}$  is the local interfacial electric  
406 field. This formulation captures the enhanced cross-interface carrier transfer under forward bias  
407 without assigning a unique microscopic hopping mechanism.

408 To account for finite post-pulse charge retention in the multilayer LED stack, a voltage-dependent  
409 retention factor was introduced as

$$410 \quad G_V(t) = \text{clip}[k_V V_{\text{int}}(t), 0, 1]$$

411 where  $V_{\text{int}}(t)$  is the internal device voltage and  $k_V$  is a phenomenological voltage-scaling factor. This  
412 retention factor was used to scale contact exchange and voltage-assisted interfacial carrier exchange,  
413 and to suppress carrier outflow from the EML into the adjacent transport layers as the internal voltage  
414 decays. Physically,  $G_V(t)$  represents the combined effect of finite device capacitance, interfacial  
415 barriers, and incomplete carrier extraction immediately after the external bias is removed. It is not a  
416 carrier-generation term and is applied identically to the simulations with and without the IR push;  
417 therefore, the calculated differential EL response arises from the push-induced redistribution of stored  
418 electron-side charge rather than from a change in the electrical driving waveform.

419 Before the transient simulation, the device was relaxed at zero applied bias until the coupled carrier,  
420 trapped-charge, and electrostatic-potential distributions converged to a stationary state. The forward-  
421 bias pulse therefore builds interfacial space charge on top of a self-consistent initial electrostatic and  
422 trap occupation profile. This initialization is important because the pre-existing built-in potential and  
423 trap population influence the formation of the electron-side space-charge reservoir once the electrical  
424 pulse is applied.

425

426

#### 428 **4. Interfacial trap manifold and push-assisted space-charge mobilization**

429 A push-active interfacial trapped-electron reservoir was introduced on the EML/ETL side of the  
 430 device, extending over the first 6 nm within the ETL side of the heterojunction. In the simplified  
 431 model, the interfacial trapped charge was represented by a single effective trap population  $n_t(x, t)$ ,  
 432 rather than by a distributed trap density of states. The occupancy of this effective trapped-electron  
 433 reservoir evolved according to:

$$443 \quad \frac{\partial n_t}{\partial t} = C_{\text{trap}} - R_{\text{th}} - R_{\text{push}} \quad (4)$$

434 where  $C_{\text{trap}}$  denotes capture of free electrons into the available trap population,  $R_{\text{th}}$  denotes thermal  
 435 release from the same reservoir, and  $R_{\text{push}}$  denotes push-induced optical release. In this effective  
 436 description, the interfacial trapped electrons serve as a pre-accumulated electron-side space-charge  
 437 reservoir without introducing an explicit distribution of trap depths. The push pulse does not generate  
 438 an independent carrier population. Instead, it acts on electron-side space charge that has already been  
 439 established during the electrical pulse. Within this framework, a single optical event mobilizes two  
 440 pre-existing electron reservoirs: (i) trapped electrons in the interfacial trap reservoir and (ii) mobile  
 441 electrons in the near-interfacial ETL region. For the trapped contribution, the instantaneous push-  
 442 induced release rate is written as:

$$444 \quad R_{\text{push}}(x, t) = v_{\text{push}}^0 g_{\text{push}}(t) w_x^{\text{push}} n_t(x, t) \quad (5)$$

445 where  $g_{\text{push}}(t)$  is the normalized Gaussian temporal profile of the push pulse,  $v_{\text{push}}^0$  is the peak  
 446 optical release rate, and  $w_x^{\text{push}}$  is the spatial weighting factor that imposes the decay of the push-  
 447 active interfacial region.

448 For the mobile-electron contribution, the model integrates the pre-existing near-interfacial ETL  
 449 electron space charge using an exponentially decaying spatial weight on the ETL side. The push  
 450 converts this mobile space-charge reservoir into an injected electron flux through an effective  
 451 mobilization velocity. The mobile and trapped push-released contributions are then combined into a  
 452 total injection flux:

$$453 \quad \Phi_{\text{push,total}}(t) = \Phi_{\text{push,free}}(t) + \Phi_{\text{push,trap}}(t) \quad (6)$$

454 which is deposited directly into the EML through a normalized near-interfacial source profile:

455 
$$S_{\text{push,inj}}(x, t) = \Phi_{\text{push,total}}(t) \exp\left[\frac{x_{\text{int}} - x}{\lambda_{\text{push}}}\right] \quad (7)$$

456 where  $x$  restricted to the EML side of the EML/ETL interface.  $x_{\text{int}}$  is the position of the EML/ETL  
 457 interface, and  $\lambda_{\text{push}}$  is the characteristic decay length of the push-induced injection profile. Within  
 458 this framework, the same push event both depletes electron-side space charge from the ETL side and  
 459 reinjects the released charge into the adjacent EML region. No separate interfacial emissive state is  
 460 introduced. The prompt rise in  $\Delta EL$  is therefore attributed to the immediate enhancement of local bulk  
 461 recombination in the near-interfacial EML region, whereas the delayed component reflects the  
 462 subsequent redistribution of the same push-released electrons through the perovskite layer.

463

## 464 **5. Signal construction, fitting protocol, and diagnostics**

465 The raw electroluminescence was calculated from the spatially integrated bimolecular radiative  
 466 recombination rate:

467 
$$EL_{\text{raw}}(t) = \int B_{\text{rad}}(x) n(x, t) p(x, t) dx \quad (8)$$

468 where  $B_{\text{rad}}(x)$  is the local bimolecular radiative recombination coefficient and  $n(x, t)$  and  $p(x, t)$   
 469 are the local mobile electron and hole densities. Because  $B_{\text{rad}}(x)$  was set to zero in the HTL and ETL,  
 470 the integral effectively reduces to the perovskite EML. The experimentally observable signal was  
 471 then obtained by convolving  $EL_{\text{raw}}(t)$  with a normalized Gaussian photomultiplier response function  
 472  $G_{\text{PMT}}(t)$  with a full width at half maximum of 5 ns:

474 
$$EL_{\text{meas}}(t) = EL_{\text{raw}}(t) * G_{\text{PMT}}(t) \quad (9)$$

473 The push-induced electroluminescence change was defined as:

475 
$$\Delta EL(t) = EL_{\text{meas,with push}}(t) - EL_{\text{meas,no push}}(t) \quad (10)$$

476 where the two measured EL traces correspond to simulations performed with and without the  
 477 infrared push pulse.

478

479

480

481

482

483 **6. Fixed device parameters used in the simulation**484 **Table S1. Fixed layer properties used in the full-device simulation.**

| Layer                        | Thickness<br>(nm) | $\epsilon_r$ | $\mu_n$<br>( $\text{cm}^2 \text{V}^{-1} \text{s}^{-1}$ ) | $\mu_p$<br>( $\text{cm}^2 \text{V}^{-1} \text{s}^{-1}$ ) | $N_c$ ( $\text{cm}^{-3}$ ) | $N_v$ ( $\text{cm}^{-3}$ ) |
|------------------------------|-------------------|--------------|----------------------------------------------------------|----------------------------------------------------------|----------------------------|----------------------------|
| TFB (HTL)                    | 80.0              | 3.5          | $1.0 \times 10^{-7}$                                     | $2.0 \times 10^{-3}$                                     | $1.0 \times 10^{20}$       | $1.0 \times 10^{20}$       |
| CsPbBr <sub>2</sub><br>(EML) | 75.0              | 11.0         | $5.0 \times 10^{-2}$                                     | $5.0 \times 10^{-3}$                                     | $3.0 \times 10^{18}$       | $3.0 \times 10^{18}$       |
| ZnO (ETL)                    | 40.0              | 8.3          | $3.0 \times 10^{-2}$                                     | $1.0 \times 10^{-8}$                                     | $4.0 \times 10^{18}$       | $4.0 \times 10^{18}$       |

485

486

487 **Table S2. Fixed experimental timing and numerical settings used in the transient simulations.**

| Quantity                           | Value                                     |
|------------------------------------|-------------------------------------------|
| Time window                        | -50 to 250 ns                             |
| Electrical pulse                   | 5 V rectangular pulse, 100 ns duration    |
| Push pulse                         | 1064 nm; center at 75 ns; 0.6 ns FWHM     |
| PMT response                       | Gaussian, 5 ns FWHM                       |
| Space-charge integration window    | $\pm 6.8$ nm around each interface        |
| Final carrier-map mesh / time step | $\Delta x = 1$ nm; $\Delta t = 0.01$ ns   |
| Zero-bias equilibration            | Iterative relaxation before transient run |

488

489

490
